# Supplementary material for: 2018 Survey of antimicrobial drug use and stewardship practices in adult cows on California dairies: post-Senate Bill 27
Source: PeerJ. 2021 Jul 13;9:e11515. doi: 10.7717/peerj.11515 (PMC8284310; doi:10.7717/peerj.11515)
Supplement: Supplemental Information 6 [file peerj-09-11515-s006.xlsx]

## Sheet: Sheet1
S1Q1	Role in the Dairy
	Role	Percent	SE	N	95% Confidence limits
					Lower	Upper
	Owner	83.67	3.06	147	11.14	88.86
	Calf Manager	12.24	2.71	147	7.81	18.69
	Herd Manager	31.97	3.86	147	24.87	40.03
	Calf Feeder	6.16	2	146	3.21	11.5
	Other	2.04	1.17	147	0.65	6.21
S1Q2	Location of the dairy (County)								Summary by region
	County	Freq (n=146)	Percent						Region	Freq (n=146)	Percent
	Butte	1	0.68						Northern California (NCA)	27	15.98
	Del Norte	1	0.68						Northern San Joaquin Valley (NSJV)	58	34.32
	Fresno	7	4.79						Greater Southern California (GSCA)	84	49.7
	Glenn	2	1.37
	Humboldt	3	2.05
	Kern	4	2.75
	Kings	8	5.48
	Madera	4	2.74
	Marin	2	1.37
	Marced	14	9.59
	Riverside	6	4.11
	Sacramento	4	2.74
	San Bernardino	4	2.74
	San Diego	2	1.37
	San Joaquin	14	9.59
	Siskiyou	2	1.38
	Sonoma	7	4.79
	Stanislaus	18	12.33
	Tulare	42	28.77
	Other	1	0.68
	TOTAL	146	100
S1Q3	Dairy certified producer of organic milk
	Dairy type	Percent	SE	N	95% Confidence limits
					Lower	Upper
	Organic	8.9	2.37	146	5.2	14.81
S1Q4	Herd average number of milking cows
		Mean	SE	N	95% Confidence limits
					Lower	Upper
	Milking cows	1507.18	105.12	144	1299.4	1714.96
S1Q5	Annual rolling herd average milk production lbs
		Mean	SE	N	95% Confidence limits
					Lower	Upper
		24512.7	412.43	139	23697.2	25328.2
S1Q6	Previous month's bulk tank SCC (cells/mL) (proportion of herds)
	Range (10e3)	Percent herds	SE	N	95% Confidence limits
					Lower	Upper
	<100	9.86	2.51	142	5.89	16.05
	100 - 199	42.25	4.16	142	34.31	50.62
	200 - 299	42.25	4.16	142	34.31	50.62
	300 -399	7.04	2.15	142	3.8	12.68
	400 - 499	0.7	0.7	142	0.01	4.94
	>500	1	0
S1Q6	Average bulk tank SCC for previous month
		Mean	SE	N	95% Confidence limits
					Lower	Upper
		245863	6703.32	139	232608	259118
S1Q7	Predonimant breed; proportion of herds
Need to recalculate as Holstein only, Jersey only, Mix H/J, other, crossbred(?)		Percent	SE	N	95% Confidence limits
					Lower	Upper
	Holstein	89.04	2.59	146	83.91	94.17
	Jersey	32.88	3.9	146	25.17	40.59
	Crossbred	20.03	3.64	146	18.83	33.23
	Other	6.16	2	146	2.22	10.11
	Other breeds: Angus, Ayshires, Brown Swiss, Swiss
	Predonimant breed; mean percent
		Mean (%)	SE	N	95% Confidence limits
					Lower	Upper
	Holstein	79.21	3.03	142	73.22	85.19
	Jersey	11.82	2.27	142	7.34	16.3
	Crossbred	7.58	1.87	142	3.88	11.28
	Other	0.74	0.35	142	0.05	1.43
S1Q8	Proportion of herds participating in welfare programs
Missing >20%	Program	Percent	SE	N	95% Confidence limits
					Lower	Upper
	FARM	62.86	4.01	140	54.46	70.54
	Validus	3.57	1.57	140	1.48	8.38
	Humane	2.86	1.41	140	1.06	7.45
	Other	11.43	2.7	140	7.08	17.94
		80.72
	Other programs: DFA Gold Standard Dairy, Dairy Care, Hilmar, MOCA, Environmentally certified
S2Q1	Proportion of herds treating cows with cows with antibiotics at dry-off
	Dry-off Treamnet	Percent	SE	N	95% Confidence limits
					Lower	Upper
	Don’t Treat	18.3	3.26	142	12.72	25.64
	Treat all cows	77.46	3.52	142	69.77	83.66
	Treat selected cows	4.93	1.82	142	2.35	10.06
		100.69
	Dry-tubes used include: Spectramast, Tomorrow, Quatermanster, Orbenin, Albadry, Biodry, Dry Clox
S2Q2	Sources of colostrum fed to callves: proportions
	Colostrum source	Percent	SE	N	95% Confidence limits
					Lower	Upper
	Individual cow	43.97	4.19	141	35.67	52.27
	Colostrum replacer	24.11	3.61	141	16.97	31.26
	Pooled colostrum	65.96	4	141	58	73.88
	Nurse from dam	14.89	3	141	8.94	20.84
		148.93
S2Q2	Sources of colostrum fed to callves: mean percentage
	Colostrum source	Mean (%)	SE	N	95% Confidence limits
					Lower	Upper
	Individual cow	34.61	3.61	142	27.47	41.74
	Colostrum replacer	8.73	2.03	141	4.72	12.74
	Pooled colostrum	51.17	3.75	141	43.74	58.6
	Nurse from dam	5.47	1.61	139	2.28	8.65
		99.98
S2Q3	Proportion of herds that heat-treatment colostrum fed to calves
	Colostrum Pasteurized	Percent	SE	N	95% Confidence limits
					Lower	Upper
	Yes	10.79	2.64	139	82.77	93.43
	No	87.05	2.86	139	80.28	91.73
Heat treatment regimines	Mean colostrum pasteurization temperature and time
	Pasteurization parameters	Mean (%)	SE	N	95% Confidence limits
					Lower	Upper
	Temperature (F)	133.43	4.31	13	124.04	142.82
	Time (min)	60	13.7	12	29.83	90.17
S2Q4	Calf age groups raised (proportion of herds)
	Age group	Percent	SE	N	95% Confidence limits
					Lower	Upper
	Preweaned heifers and bulls	18.44	3.28	141	12.81	25.81
	Preweaned heifers only	30.5	3.89	141	23.38	38.68
	Preweaned bulls only	2.8	1.4	141	1.1	7.4
	Postweaned heifers and bulls	23.4	3.58	141	17.08	31.2
	Postweaned heifers only	44.68	4.2	141	36.59	53.06
	Postweaned bulls only	1.42	1	141	0.35	5.58
	Others	16.31	3.12	141	11.03	23.45
	Others: keep top 5% bulls calves, calves raised second dairy, all heifers sent to calf ranch, raised 30 - 70 % of the calves, raise calves at of-site nursery
S2Q5	Mean number of preweaned calves
Need to remove zeros from mean estimate		Mean	SE	N	95% Confidence limits
					Lower	Upper
		245.9	43.02	67	160	331.78
S2Q6	Proportion of milk sources fed to calves
	Milk source	Percent	SE	N	95% Confidence limits
					Lower	Upper
	Mastitis cows treat with IMM antibiotic	55.71	5.98	70	43.69	67.12
	Cows treated injectable antibiotics	54.29	6	70	42.31	65.79
	Transition milk from cows 1 -3 DIM	70	5.52	70	58.01	79.76
	Saleable bulk tank milk	43.66	5.93	71	32.4	55.62
	Non-medicated milk replacer	54.29	6	70	43.31	65.79
	Medicated milk replacer	4.29	2.44	70	1.35	12.78
	Mean calf age fed different sources of milk
	Milk source	Mean age (days)	SE	N	95% Confidence limits
					Lower	Upper
	Mastitis cows treat with IMM antibiotic	11.81	4.24	43	3.26	20.37
		56.61	5.4	44	45.72	67.5
	Cows treated injectable antibiotics	9.375	2.85	40	3.61	15.14
		57.08	5.11	39	46.73	67.42
	Transition milk from cows 1 -3 DIM	5.42	2.28	48	0.84	10
		47.47	5.38	49	36.64	58.29
	Saleable bulk tank milk	14.69	5	32	4.48	24.89
		60	6.93	32	45.87	74.12
	Non-medicated milk replacer	11.11	3.65	37	3.71	18.5
		53.65	4.91	37	43.69	63.61
	Medicated milk replacer	2.91	2.81	11	-3.35	9.17
		9.18	6.2	11	-4.64	23
	First row = start age; bottom row = duration
S2Q7	Percent of preweaned calves liquid diet from different sources (mean %)
	Milk source	Mean %	SE	N	95% Confidence limits
					Lower	Upper
	Non saleable (hospital)	44.15	4.92	68	34.34	53.96
	Saleable (bulk tank)	28.31	4.8	68	18.73	37.89
	Milk replacer	20.56	3.89	66	12.8	28.32
	Other	3.94	2.08	66	-0.21	8.09
	Other include transition cows, fortified hospital milk and non-fat dry powder
S2Q8	Before Jan 1st 2017; use of antibiotics in milk or milk replacer fed to preweaned calves
	Health protocol	Percent	SE	N	95% Confidence limits
					Lower	Upper
	No antibiotics added	50	6.02	70	38.22	61.78
	Limited antibiotics	24.29	51.62	70	15.48	35.96
	Antibiotics added regularly	18.57	4.68	70	10.95	29.72
	Other	0	0	63
	Other: none listed
S2Q9	Before Jan 1st 2017; use of antibiotics in grain or solid feed for to preweaned calves
	Health protocol	Percent	SE	N	95% Confidence limits
					Lower	Upper
	No antibiotics added	79.71	4.88	69	68.28	87.76
	Limited antibiotics	15.94	4.43	69	8.91	26.86
	Antibiotics added regularly	4.35	2.47	69	1.37	12.96
	Other	0
S2Q10	Since Jan 1st 2017: changes made in protocol for use of antibiotics fed to calves in milk, milk replacer, grain or solid feed
	Made changes	Percent	SE	N	95% Confidence limits
					Lower	Upper
	No	75	5.3	68	63.08	84.05
	Yes, for milk or milk replacer	14.71	4.33	68	7.97	25.55
	Yes, for grain or solid feeed	4.41	2.51	68	1.39	13.14
	Yes, both milk or milk replacer and solid feed or grain	7.35	3.19	68	3.02	16.81
	Changes made
	Feeding more natural products, only feed antibiotics if a calf is found to be sick, no preventative feeding
	fed individually
	Rumensin changed to Bovatek
	Took pencor 64 out of mix
	Prior to Jan. 1, 2017, a support formula was used in the pateurized hospital milk that had antibiotics. We also would use Auromycin crumbles if we were seeing pneumonia in our 2-3 month old calves
	No more antibiotics were fed to calves
	not using Uniprym
	Tetracyline were administered in water to control respiratory disease outbreak
	No longer able to purchase scour medication that worked well for us!
	reduction in meds
	Dropped PennChlor entirely, reduced Neo med use to half
	No antibiotics are used in the milk and certain things are not used in grain for treatments
S2Q11	Milk treated before feeding to calves
	Milk treatment	Percent	SE	N	95% Confidence limits
					Lower	Upper
	Yes, pasteurized	43.66	5.93	71	32.4	55.62
	Yes, sorbitol added	0		71
	No	54.93	5.95	71	43.01	66.31
	Other	5.63	2.76	71	2.08	14.37
	Other: fortified, aurymycin added, calf saver added
S2Q12	Calf housing styles
	Housing style	Percent	SE	N	95% Confidence limits
					Lower	Upper
	Wooden California Hutch	39.44	5.84	71	28.56	51.47
	Hutch with exercise area	39.13	5.92	69	28.14	51.35
	Hutch without exercise area	22.39	5.13	67	13.79	34.22
	Group pen	25.39	5.32	69	16.9	37.98
	Other	13.24	4.14	68	6.91	23.85
	Other ; raised individual pen, home made calf cages, start in hutchs and move to group, chain, individual pen in barns
S2Q13	Vaccines used in preweaned calves
	Vaccine type	Percent	SE	N	95% Confidence limits
					Lower	Upper
	Intranasal against pneumonia	77.59	5.52	58	64.7	86.74
	Modified live against pneumonia or diarreha	52.54	6.56	59	39.54	65.21
	Killed against pneumonia or diarrhea	20.69	5.37	58	11.94	33.43
	Vaccines used in calves; mean age
	Vaccine type	Mean	SE	N	95% Confidence limits
					Lower	Upper
	Intranasal against pneumonia	5.46	2.05	41	1.33	9.6
	Modified live against pneumonia or diarreha	35.54	6.72	31	21.63	49.08
	Killed against pneumonia or diarrhea	19.33	6.19	15	6.66	33.21
S2Q14	Vaccines administered to lactating cows to protect calves throug colostrum
	Vaccine type	Percent	SE	N	95% Confidence limits
					Lower	Upper
	Modified live, vs repiratory disease	50.79	6.35	63	38.32	63.17
	Killed, vs repsiratory disease	46.77	6.39	62	34.47	59.48
	Killed vs diarrhea	36.07	6.2	61	24.78	49.13
S3Q1	Sources of information antibiotic used to treat calves
		Percent	SE	N	95% Confidence limits
					Lower	Upper
	Previous experience	66.15	5.91	65	53.55	76.81
	Product label	27.69	5.59	65	17.98	40.09
	Sales representative	32.31	5.85	65	21.86	44.88
	Websites	1.54	1.54	65	0.2	10.62
	Promotional materials	9.23	3.62	65	4.11	19.42
	FARAD (Food Animal Residue Avoidence Databank)	0
	Cooperative extenison	0
	Veterinarian	84.62	4.51	65	73.35	91.66
	Other producers	16.92	4.69	65	9.47	28.39
	Magazines and Journals	12.31	4.1	65	6.16	23.09
	Local/natioanal meetings	3.08	2.16	65	0.74	11.88
	Other	12.31	4.1	65	6.16	23.09
S3Q2	Decision maker on type of antibiotic purchased and stocked on the dairy
	Decision making	Percent	SE	N	95% Confidence limits
					Lower	Upper
a	Antibiotics in feed
	Owner	69.35	5.9	62	56.5	79.77
	Veterinarian	49.2	6.35	63	36.83	61.68
	Herd manager	25.4	5.53	63	15.97	37.89
	Calf manager	20.63	5.14	63	12.19	32.75
	Nutritionist	3.17	2.22	63	0.76	12.24
	Other	0
b	Injectable or oral antibiotics
	Owner	65.67	5.84	67	53.27	76.25
	Veterinarian	46.27	6.14	67	34.47	58.5
	Herd manager	31.34	5.71	67	21.18	43.68
	Calf manager	25.37	5.36	67	16.2	37.42
	Nutritionist	1.49	1.49	67	0.2	10.31
	Other	1.49	1.49	67	0.2	10.31	son of calf-feeder
S3Q3	Treat preweaned calves on first day of illness
	Owner	50.06	6.16	66	43.65	67.76
	Veterinarian	28.79	5.62	66	18.96	41.13
	Herd manager	21.21	5.07	66	12.81	33.04
	Calf manager	45.45	6.18	66	33.63	57.81
	Nutritionist	0
	Other	1.52	1.52	66	0.2	10.47	Other; calf feeder
S3Q4	Trearment protocol for preweaned calves
	Tretment protocol	Percent	SE	N	95% Confidence limits
					Lower	Upper
	Have treatment protocol	63.93	62	61	50.87	75.22
	Protocl developed by vet	50	8.7	34	33	67
	Protocol developed by owner	17.65	6.64	34	7.8	35.17
	Protocol developed by owner and vet	30.3	8.12	33	16.57	48.77
	Treatment protocol content
	Vaccinations	89.74	4.92	39	74.77	96.27
	Disease definitions	41.03	7.98	39	26.3	57.56
	Disease specific treatments	66.67	7.65	39	49.91	80.06
	Treatment information
	Dosage	64.1	7.78	39	47.38	77.98
	Duration	58.97	79.79	39	42.44	73.7
	Withdrawal period	51.28	8.11	39	35.3	67
	Not sure of details	0
	Other information	5.13	3.58	39	1.2	19.33
	Access to protocol
	Owner	78.95	6.7	38	62.36	89.46
	Herd manager	57.89	8.11	38	41.19	72.97
	Office staff	5.26	3.67	38	1.23	19.8
	Calf manager	57.89	8.11	38	41.19	72.97
	Calf feeder	36.84	7.93	38	22.63	53.78
	Nutritionist	10.52	5.05	38	3.82	25.83
	Veterinarian	57.89	8.12	38	41.19	72.97
	Calf treatment crew	21.05	6.7	38	10.54	37.64
	I don’t know	0
	Protocol review schedule
	Once to twice a year	51.35	8.33	37	34.93	67.49
	Every few years	18.92	6.53	37	8.96	35.61
	I don’t know	8.11	4.55	37	2.5	23.34
	Other	24.32	7.15	37	12.75	41.41	Every month, when needed, when problem occurs,
S3Q5	Keep drug inventory log on dairy
	Keep drug inventory	Percent	SE	N	95% Confidence limits
					Lower	Upper
	Yes	32.31	5.85	65	21.86	44.88
S3Q6	Drug related information tracked on dairy
	Information	Percent	SE	N	95% Confidence limits
					Lower	Upper
	Name of drug	60	6.38	60	46.85	71.85
	Manufacturer	21.67	5.36	60	12.81	34.24
	Expiration date	33.33	6.14	60	22.34	46.49
	Quantity at hand	55.93	6.52	59	42.78	68.31
	Supplier	22.03	5.44	59	13.04	34.76
	Purchase date	15.25	4.72	59	7.97	27.21
	Cost	27.12	5.84	59	17.08	40.19
	None of the above	10.17	3.97	59	4.53	21.27
	Other	5	2.84	60	1.57	14.82	Drugs not used; Penicillin; Indication and treatment outcome
S3Q7	Indications for antibiotic use in preweaned calves on the farm
	Indication	Percent	SE	N	95% Confidence limits
					Lower	Upper
	Treat sick animals	90.48	3.73	63	80	95.76
	Control ongoing disease	12.7	4.23	63	6.35	23.77
	Prevent disease in high risk calves	11.11	3.99	63	5.28	21.9
	Other	4.77	2.7	63	1.5	14.14	Antibiotics not used; Antibiotics rarely used; No sick calves
S3Q8	Estimating antibiotic dosage for preweaned calves
	Dosage estimation	Percent	SE	N	95% Confidence limits
					Lower	Upper
	Body weight and label dosage	87.1	4.3	62	75.87	93.54
	Body weight and experience	3.23	2.26	62	0.78	12.43
	Body weight and vet authorisation	14.52	4.51	62	7.59	25.99
	Standard dosage by animal category	17.42	4.89	62	9.94	29.66
	Level of clinical illness	3.23	2.26	62	0.78	12.43
	Different approaches for different drugs	14.52	4.51	62	7.59	25.99
	Other	3.23	2.26	62	0.78	12.41	"not listed"
S3Q9	Estimating antibiotic treatment duration for preweaned calves
	Estimating treatment duration	Percent	SE	N	95% Confidence limits
					Lower	Upper
	Antibiotics added to feed
	Follow label instruction	74.55	5.93	55	61.02	84.56
	Stop early if animal is cured	20	5.44	55	33.09
	Extend use if animal still sick	21.82	5.62	55	12.6	35.08
	Based on previous results on the farm	16.36	5.03	55	8.56	29.03
	Different approaches for different diseases	7.27	3.53	55	2.67	18.32
	Other	18.18	5.25	55	9.87	31.07	low level continous; not used; organis; vet recommendation; occassionally
	Antibiotics via injection or orally
	Follow label instruction	88.13	4.25	59	76.72	94.36
	Stop early if animal is cured	25.42	5.72	59	15.71	38.4
	Extend use if animal still sick	35.59	6.29	59	24.19	48.9
	Based on previous results on the farm	13.56	4.5	59	6.79	25.26
	Different approaches for different diseases	11.86	4.25	59	5.64	23.28
	Other	6.78	3.3	59	17.14		organic; vet recommendation; not used
S3Q10	Decision basis for choosing second antibiotic if first treatment was not satisfactory
	Decision for 2nd antibiotic	Percent	SE	N	95% Confidence limits
					Lower	Upper
	Culture and antibiotic sensitivity	10	3.9	60	4.45	20.93
	Talk with veterinarian	63.33	6.27	60	50.15	74.78
	Farm protocol	28.33	5.87	60	18.15	41.34
	Previous result	45	6.48	60	32.64	58
	Other	6.67	3.25	60	2.45	16.87	organic; experiment with a few calves; don’t have a second antibiotic
S3Q11	Antibiotic treatment information recorded for preweaned calves
	Information recorded	Percent	SE	N	95% Confidence limits
					Lower	Upper
	*	82.26	4.89	62	70.34	90.06
	Dose	43.55	6.35	62	31.52	56.37
	Route	14.52	4.51	62	7.59	25.99
	None of the above	14.52	4.51	62	7.59	25.99
	Other	8.06	3.49	62	3.31	18.34	Drug used; organic
S3Q12	Method of tracking antibiotic used in preweaned calves
	Record systems	Percent	SE	N	95% Confidence limits
					Lower	Upper
	Computer software	26.23	5.68	61	16.5	39.01	Computor record
	Papper records in barn/office	55.73	6.41	61	42.82	67.93
	Memory	16.4	4.78	61	8.89	28.26
	Treatment record/marking on hutch	29.51	5.89	61	19.2	42.44
	Other	8.2	3.54	61	33.66	18.63	Organic, chalked
S3Q13	Keep record of antibiotic withdrawal intervals for treated calves
	Record system	Percent	SE	N	95% Confidence limits
					Lower	Upper
	No, don’t keep track	40	6.37	60	28.15	53.15
	Yes
	Marking calf's hutch	12.07	4.31	58	5.73	23.65
	Paper records	31.03	6.13	58	20.23	44.39
	Memory	8.62	3.72	58	3.54	19.53
	Computer software	22.41	5.52	58	13.26	35.3	DC305; DAI; DHIA; DHIP;
	Other	3.57	2.5	56	0.86	13.71	phone; chalk
S3Q14	Mean percentage of calves treated between birth and weaning with different antimicrobial compounds
revisit 95% CI estimatation method	Antimicrobial drug	Mean	SE	N	95% Confidence limits
					Lower	Upper
	Liquid feed (milk or milk replacer)
	Neomycin sulfate (Biosol, Neo-Sol or Neomycin liquid)	62.8	15.2	10	28.41	97.19
	Chlortetracycline (Aureomycin)	44	22.88	5	-19.53	107.53
	Neomycin -oxytetracycline (Neo-Terramycin 100/100)	36.25	21.54	4	-32.31	104.81
	Lincomycin-spectinomycin (Linco-Spectin 100, L-S 50)	0		0
	Spectinomycin 9Spectam)	27.5	22.5	2	-258.39	313.39
	Oxytetracycline (Crumbles, Terramycin 200, Oxytet, Terra-Vet)	56.67	23.33	3	-43.73	157.06
	Sulfamethazine 9SMZ-Med 454, Sulmet)	29.17	14.56	6	-8	66.33
	Bacitracin (BMD Soluble, Albac 50 Granular)	0		0
	Coccidiostats (Corid, Deccox, Rumensin, Bovatec)	100	0	4
	Other	100		1			Calf scour
	Solid feed (grain)
	Neomycin sulfate (Biosol, Neo-Sol or Neomycin liquid)	0		0
	Chlortetracycline (Aureomycin)	52.5	47.5	2	-551.04	656.04
	Neomycin -oxytetracycline (Neo-Terramycin 100/100)	10		1
	Lincomycin-spectinomycin (Linco-Spectin 100, L-S 50)	0		0
	Spectinomycin 9Spectam)	0		0
	Oxytetracycline (Crumbles, Terramycin 200, Oxytet, Terra-Vet)	70	30	3	-59.08	199.08
	Sulfamethazine 9SMZ-Med 454, Sulmet)	5		1
	Bacitracin (BMD Soluble, Albac 50 Granular)	0		0
	Coccidiostats (Corid, Deccox, Rumensin, Bovatec)	95.63	3.29	16	88.62	102.63
	Other	0		0
	Water
	Neomycin sulfate (Biosol, Neo-Sol or Neomycin liquid)	5		1
	Chlortetracycline (Aureomycin)	7.5	2.5	2	-24.27	39.27
	Neomycin -oxytetracycline (Neo-Terramycin 100/100)	100	0
	Lincomycin-spectinomycin (Linco-Spectin 100, L-S 50)	0		0
	Spectinomycin 9Spectam)	50		1
	Oxytetracycline (Crumbles, Terramycin 200, Oxytet, Terra-Vet)	5		1
	Sulfamethazine 9SMZ-Med 454, Sulmet)	75	25	2	-242.66	392.66
	Bacitracin (BMD Soluble, Albac 50 Granular)	100		1
	Coccidiostats (Corid, Deccox, Rumensin, Bovatec)	51.67	17.35	6	7.06	96.27
	Other	5.5	4.5	2	-51.68	62.68	Calf Guard
S3Q15	Sincce Jan 1st 2017: Antibiotics used to treat individual preweaned calves against respiratory diseases
	Antimicrobial drug	Freq	Percent
	First choice
	Ampicillin	1	2.04
	Ceftiofur	8	16.33
	Enrofloxacin	4	8.16
	Florfenicol	21	42.86
	Gamithromycin	2	4.08
	Oxtetracycline	4	8.16
	Penicillin	1	2.04
	Tildipirosin	1	2.04
	Tulathromycin	5	10.2
	Tylosin	1	2.04
	None	1	2.04
	Second choice
	Ampicillin	1	3.03
	Enrofloxacin	5	15.15
	Enrofloxacin & Florfenicol	2	6.06
	Florfenicol	8	24.24
	Flunixin Meglumine	1	3.03
	Oxytetracycline	1	3.03
	Penicillin	2	6.06
	Tildipirosin	1	3.03
	Tilmicosin	1	3.03
	Tulathromycin	11	33.33
	Sincce Jan 1st 2017: Antibiotics used to treat individual preweaned calves against diarrhea
	Antimicrobial drug	Freq	Percent
	First choice	2	4.44
	Adsorbant	1	2.22
	Ampicillin	4	8.89
	Bismuth subsalicylate	7	15.56
	Ceftiofur	3	6.67
	Enrofloxacin	1	2.22
	Florfenicol	1	2.22
	Ivermectin	3	6.67
	Neomycin	2	4.44
	Oxtetracycline	1	2.22
	Penicillin	1	2.22
	SMZ/Bismuth/Charcoal	1	2.22
	Salt solutions	3	6.67
	Spectinomycin	2	4.44
	Sulfamethoxazole	1	2.22
	Sulfonamide & Ceftiofur	1	2.22
	Sulfonamide	11	24.44
	Second choice
	Ceftiofur	3	17.65
	Enrofloxacin	2	11.76
	Florfenicol	1	5.88
	Oxytetracycline	2	11.76
	Penicillin	2	11.76
	Sunfonamide	3	17.65
	Tulathromycin	1	5.88
	Salt solutions	1	5.88
	Penicillin & Ceftiofur	1	5.88
	Ampicillin	1	5.88
	Other Diseease	Freq	Percent
	Infection	2	40
	Injuries	1	20
	Scours	1	20
	Septic joint	1	20
	Other Drugs	Freq	Percent
	Oxytetracycline	2	22.22
	Flunixin Meglumine	1	11.11
	Ceftiofur	1	11.11
	Gentamicin	1	11.11
	Penicillin	1	33.33
	Salt solutions	1	11.11
S3Q16	Antibiotics used in extra-label fashion
	Extra-Label Antibiotic use	Percent	SE	N	95% Confidence limits
					Lower	Upper
	Yes	16.67	4.85	60	9.04	28.69
	No	78.33	5.36	60	65.77	87.19
	I don’t know	5	2.84	60	1.57	14.82
S3Q17	Have you submitted calves for infectious disease diagnosis in 2017
	Submitted calves for diagnosis	Percent	SE	N	95% Confidence limits
					Lower	Upper
	Yes	27.87	5.79	61	17.84	40.73
	No	70.49	5.89	61	57.56	80.8
	I don’t know	1.64	1.64	61	0.22	11.3
S3Q18	Have used other diagnostic techniques to guide antibiotic treatment of preweaned calves
	Submitted calves for diagnosis	Percent	SE	N	95% Confidence limits
					Lower	Upper
	Yes	30.16	5.83	63	19.89	42.88
	No	66.67	5.99	63	53.86	77.41
	I don’t know	1.59	1.59	63	0.21	10.95
S3Q19	Most common injectable antibiotics for pneumonia and diarrhea
	Common Inj Antibiotics	Freq	Percent
	Pneumonia
	Enrofloxacin	2	4
	Ceftiofur	5	10
	Tulathromycin	6	12
	Florfenicol	25	50
	Organic	2	4
	Oxytetracycline	6	12
	Tylosin	1	4
	Gamithromycin	2	2
	Ampicillin	1	1
	Diarrhea
	Ampicillin	2	5.41
	Enrofloxacin	5	13.51
	Bismuth subsalicylate	2	5.41
	Ceftiofur	9	24.32
	Florfenicol	2	5.41
	Neomycin	2	5.41
	Not used/not used	3	8.11
	Penicillin	1	2.7
	Sulfonamide	3	8.11
	Salts and Adsorbants	5	13.51
	Spectinomycin	2	5.41
	Tetracycline	1	2.7
S3Q20	Preweaned calf disease management
Vet versus non-vet
	Disease mgt decision	Percent	SE	N	95% Confidence limits
					Lower	Upper
	Whom do you consult
	Veterinarian	96.77	2.26	62	87.57	99.22
	Nutritionist	17.74	4.89	62	9.94	29.66
	Pharmaceutical Co. vet/nutritionist	12.9	4.29	62	6.46	24.13
	Pharmaceutical Co. Sales rep.	12.9	4.29	62	6.46	24.13
	Other	1.61	1.61	62	0.21	11.12	Milk replacer and grain company consultant
	Who prescribes antibiotics in feed or water
	Veterinarian	71.43	6.09	56	57.89	81.97
	Nutritionist	7.14	3.47	56	2.62	18
	Pharmaceutical Co. vet/nutritionist	0		56
	Pharmaceutical Co. Sales rep.	1.79	1.79	56	0.24	12.27
	Other	16.07	4.95	56	8.4	28.55	Organic; Company mix
S3Q21	Have VCPR
	Have VCPR	Percent	SE	N	95% Confidence limits
					Lower	Upper
	No	4.61	2.62	65	1.45	13.72
	Yes	93.84	3	65	84.36	97.73
	Yes,Private or local veterinarian or clinic	89.23	3.87	65	78.73	94.88
	Yes, Technical services/consulting veterinarian	4.62	2.62	65	1.45	13.72
	Other	1.54	1.54	65	0.2	10.62	"I think so'
S3Q22	VCPR description
	VCPR description	Percent	SE	N	95% Confidence limits
					Lower	Upper
	Signed written agreement	47.54	6.45	61	35.08	60.32
	Verbal agreement	42.62	6.38	61	30.59	55.6
	VCPR not discussed, assumed based of vet care	14.75	4.58	61	7.71	26.39
	Other	1.64	1.64	61	0.22	11.3	Long friendship with owner
S3Q23	Frequency vet observe, monitor or discuss health of preweaned calves
	Vet visit frequency	Percent	SE	N	95% Confidence limits
					Lower	Upper
	Regular	39.34	6.31	61	27.66	52.39	(Mean days 15.23; SE 6.77; CI (1.67, 28.79);n=57)
	As needed	63.93	6.2	61	50.87	75.22
	Other	3.28	2.3	61	0.79	12.63	Weekly visit for repro; sometimes as needed
S3Q24	Changes on dairy for preweaned calves since Jan 1st 2017 compared to 2016
Change unipyrim under other as antibiotic idscontinued	Changes since Jan 1st 2017	Percent	SE	N	95% Confidence limits
					Lower	Upper
	Antibiotic used in milk or milk replacer
	No changes made	61.02	6.41	59	47.73	72.85
	Increased amoun or duration of antibiotics	1.69	1.69	59	0.22	11.67
	Decreased amount or duration of antibiotics	10.17	3.97	59	4.53	21.27
	Discontinued 1 or more antibiotics	18.64	5.11	59	10.45	31.04
	Added 1 or more antibiotics	1.69	1.69	59	0.22	11.67
	Other	8.47	3.66	59	3.48	19.22	Organic; used occassionally; stopped uniprym
	Antibiotics used in grain or solid feed
	No changes made	81.67	5.03	60	69.44	89.73
	Increased amoun or duration of antibiotics	0		60
	Decreased amount or duration of antibiotics	5	2.84	60	1.57	14.82
	Discontinued 1 or more antibiotics	5	2.84	60	1.57	14.82
	Added 1 or more antibiotics	1.67	1.67	60	0.22	11.48
	Other	5	2.84	60	1.57	14.82	Organic
	Antibiotics used in water
	No changes made	83.61	4.78	61	71.74	91.11
	Increased amoun or duration of antibiotics	0		61
	Decreased amount or duration of antibiotics	1.64	1.64	61	0.22	11.3
	Discontinued 1 or more antibiotics	1.64	1.64	61	0.22	11.3
	Added 1 or more antibiotics	4.92	2.79	61	1.54	14.58
	Other	6.56	3.2	61	2.41	1.66	Organic
S3Q25	Since VFD 2017: changes in use of OTC antibiotics for feed that do not fall under VFD
	Changes in OTC Jan 1st 2017	Percent	SE	N	95% Confidence limits
					Lower	Upper
	Increased	1.85	1.85	54	0.24	12.71	Less medicine in milk; more aggressive
	Decreased	10.91	4.24	55	4.86	22.71	Its illegal; a lot dies; all medicne purchased with prescription
	I don’t know	59.26	6.75	54	45.36	71.82
S3Q26	Since VFD 2017; have you started using alternatives to antibiotics?
	Begun using alternatives to antibiotics	Percent	SE	N	95% Confidence limits
					Lower	Upper
	Vitamins	32.56	7.23	43	19.9	48.41
	Minerals	25.58	6.73	43	14.41	41.24
	Herbal remedies	11.63	4.95	43	4.74	25.79
	Pathogen specific antibodies	6.98	3.93	43	2.16	20.3
	Others	44.19	7.66	43	29.72	59.71	Organic; always used vitamins; more IV fluids; no change; using more probiotics
S3Q27	Since VFD 2017; how do you describe antibiotic costs
	Antibiotic costs after VFD 2017	Percent	SE	N	95% Confidence limits
					Lower	Upper
	Increased	13.11	4.36	61	6.56	24.49
	Decreases	16.39	4.78	61	88.93	28.26
	No change	69.49	6.06	59	56.28	80.12
S3Q28	Importance of antibiotics in raising preweaned calves-areas that will be affecetd I you stopped using antibiotics
	Effect of stopping antibiotics	Percent	SE	N	95% Confidence limits
					Lower	Upper
	Increase in disease prevalence	62.5	6.1	64	49.77	73.71
	Calf welfare affected	73.44	5.56	64	60.99	83.02
	Decrease in growth and performance	54.68	6.27	64	42.12	66.81
	No effect or difference	14.06	4.38	64	73.89	25.24
	Organic dairy (don’t use antibiotics)	7.81	3.38	64	3.21	17.8
	Other	9.52	3.73	63	4.24	18	Increased risk of epidemics; more calves dying; most calves would be unaffected
S3Q29	Ranking imprortance of antibiotics in raisning preweaned calves
	Rank-Importance of antibiotics	Percent	SE	N	95% Confidence limits
					Lower	Upper
	Extremely important	39.06	6.15	64	27.67	51.78
	Important	37.5	6.1	64	26.29	50.23
	Somewhat important	17.19	4.75	64	9.62	28.8
	Not important	10.94	3.93	64	5.2	21.58
	Orgainic dairy	7.81	3.38	64	3.21	17.8
S4Q1	Ranking antibiotic drug use practices (1 most important, 5 least important)
	Rant Stewardship practices	Mean	SE	N	95% Confidence limits
					Lower	Upper
	Appropriate drug, dose, route, duration	1.91	0.1	134	1.72	2.1
	Good record keeping	2.65	0.11	132	2.44	2.86
	Current VCPR	3.03	0.13	133	2.78	3.28
	Observing withdrawal periods	2.73	0.12	131	2.5	2.97
	Alternatives to antibiotics	3.69	0.14	131	3.41	3.96
S4Q2	Knowledeg of change starting Jan 1st 2018 all OTC antibiotics will require veterinary prescription
	Aware of chsnge 1st Jan 2018	Percent	SE	N	95% Confidence limits
					Lower	Upper
	Yes	82.73	3.22	139	75.43	88.21
S4Q3	Are you currently treat calves with injectable antibiotics or boluses purchased OTC?
	Current OTC antibiotic use	Percent	SE	N	95% Confidence limits
					Lower	Upper
	Yes, OTC antibiotics label use	35.66	4.23	129	27.78	44.4
	No, OTC antibiotcis used extra-label	6.2	2.13	129	3.1	12.01
	No, OTC antibiotics not being used	38.76	4.31	129	30.65	47.54
	Don’t know, not sure	16.28	3.26	129	10.8	23.8

## Sheet: 2018_AdultCow_Survey
			Herd size
Category		Question	<1305					1305-3500					>3500
			Percent	SE	N	95% Confidence limits		Percent	SE	N	95% Confidence limits		Percent	SE	N	95% Confidence limits
						Lower	Upper				Lower	Upper				Lower	Upper
End of lactation practices	Q8a	Blanket treatment of all dry cows
		Yes	80.5	4.4	66	70.4	87.7	94.8	2.9	55	85	98.3	100	0	9
		No	19.5	4.4	16	12.3	29.6	5.2	2.9	3	1.7	14.9	0		0
	Q8b	Selective dry-cow treatment [SDCT]
		Yes	15.9	4	13	9.4	25.5	13.8	4.5	8	7	25.3	11.1	10.5	1	1.51	50.4
		No	84.1	4	69	74.5	90.6	86.2	4.5	50	74.7	92.9	88.9	10.5	8	49.6	98.5
Decision maker (Q14 a and b)	Q14a	Who decides oral antibiotic to purchase?
		Include Veterinarian	45.6	5.6	36	34.9	56.7	51.8	6.7	29	38.7	64.6	44.4	16.6	4	17.5	75.1
		Dairy personnel only	54.4	5.6	43	43.3	65.1	48.2	6.7	27	35.4	61.2	55.6	16.6	5	24.9	82.5
	Q14b	Who decides injectable antibiotic to purchase?
		Include Veterinarian	47.2	5.9	34	35.9	58.8	50.9	6.9	27	37.6	64.1	55.6	16.6	5	24.9	82.5
		Dairy personnel only	52.8	5.9	38	41.2	64.1	49.1	6.9	26	35.9	62.4	44.4	16.6	4	17.5	75.1
Treatment or health protocols	Q16	Have written/computerized health protocol
		Yes	62.9	5.4	51	51.9	72.8	91.4	3.7	53	80.8	96.4	77.8	13.9	7	41.8	94.5
		No	37.1	5.4	30	27.2	48.1	8.6	3.7	5	3.61	19.2	22.2	13.9	2	41.8	94.5
Record keeping for antibiotic treatment	Q24	How do you track antibiotic treatments given to cows?
		Computer + Others	49.4	5.6	39	38.5	60.3	80.7	5.2	46	68.3	89.1	100	0	9
		No computer	50.6	5.6	40	39.7	61.5	19.3	5.2	11	10.9	31.7	0		0
Dairy QA	Q33	Participate in animal welfare audit programs for dairy farms
		Yes	98.5	1.5	64	89.7	99.8	97.9	2.1	48	86.7	99.7	87.5	11.7	7	45.7	98.3
		No	1.5	1.5	1	0.2	10.3	2.1	2.1	1	0.3	13.3	12.5	11.7	1	1.7	54.3
SB 27	Q36	Aware MIAD require prescription, no more sold OTC since 2018
		Yes	97.4	1.8	76	90.2	99.4	100	0	56			100	0	9
		No	2.6	1.8	2	0.6	9.8	0		0			0		0
SB 27 affects	Q41a	Antibiotic drug cost since 1.1.2018 compared to 2017 and earlier
		Increased	29.9	5.2	23	20.7	41.1	19.3	5.2	11	10.9	31.7	11.1	10.5	1	1.5	50.4
		Deceased	23.3	4.8	18	15.2	34.2	29.8	6.1	17	19.3	42.9	66.7	15.7	6	33.1	89.1
		No change	46.8	5.7	36	35.9	57.9	50.9	6.6	29	30	63.6	22.2	13.9	2	5.5	58.2
	Q41a	Farm animal health since 1.1.2018 compared to 2017 and earlier
		Better	24.7	5.1	18	16.1	35.9	38.2	6.6	21	26.3	51.7	50	17.7	4	19.8	80.2
		Worse	6.8	2.9	5	2.9	15.5	7.3	3.5	4	2.7	17.9	12.5	11.7	1	1.7	54.2
		No change	68.5	5.4	50	56.9	78.2	54.5	6.7	30	41.3	67.2	37.5	17.1	3	12.4	71.8
			Mean	Std. Error	N	95% CI L	95% CI H	Mean	Std. Error	N	95% CI L	95% CI H	Mean	Std. Error	N	95% CI L	95% CI H
Average number of cows treated per month		Mastits	22.4	7.3	46	7.9	36.9	67.6	9.5	36	48.6	86.5	136	50.7	6	35.3	236.7
		Metritis	14.6	3.2	35	8.3	20.9	29.9	4.4	33	21.2	38.7	62.8	20.2	5	22.5	103.1
		Lameness	13	4.2	39	4.7	21.3	27	8.7	34	9.7	44.3	67.7	39.7	6	0	146.7
		Pneumonia	3.5	0.7	32	2.1	4.8	2.7	0.5	28	1.7	3.7	6.7	1,7	6	3.2	10.1
		Post-surgery	0.34	0.12	32	0.11	0.57	0.54	0.15	28	0.24	0.83	0.6	0.4	5	0	1.39
			Mean	Std. Error	N	95% CI L	95% CI H	Mean	Std. Error	N	95% CI L	95% CI H	Mean	Std. Error	N	95% CI L	95% CI H
Monthly incidence per 100 cows		Mastits	2.96	0.63	46	1.68	4.24	2.94	0.36	36	2.21	3.68	3.31	1.41	6	0	6.95
		Metritis	2.48	0.53	35	1.41	3.51	1.34	0.18	33	0.96	1.72	1.39	0.51	5	0	2.8
		Lameness	1.72	0.41	39	0.89	2.05	1.24	0.4	34	0.42	2.06	1.48	1.06	6	0	4.21
		Pneumonia	0.62	0.14	32	0.32	0.91	0.12	0.02	28	0.08	0.16	0.12	0.03	6	0.03	0.2
		Post-surgery	0.06	0.02	32	0.01	0.11	0.02	0.01	28	0.01	0.04	0.01	0.01	5	0	0.04
			Region
			Northern California 1					Northern San Joaquin Valley 2					Greater southern California 0
		Role	Percent	SE	N	95% Confidence limits		Percent	SE	N	95% Confidence limits		Percent	SE	N	95% Confidence limits
						Lower	Upper				Lower	Upper				Lower	Upper
End of lactation practices	Q8a	Blanket treatment of all dry cows
		Yes	42.9	10.8	9	23.9	64.2	93.1	3.3	54	82.9	97.4	95.7	2.4	67	87.4	98.6
		No	57.1	10.8	12	35.8	76.1	6.9	3.3	4	2.6	17.1	4.3	2.4	3	1.4	12.6
	Q8b	Selective dry-cow treatment [SDCT]
		Yes	14.3	7.6	3	4.6	36.4	15.5	4.8	9	8.2	27.3	14.3	4.2	10	7.8	24.7
		No	85.7	7.6	18	63.6	95.4	84.5	4.8	49	72.7	91.8	85.7	4.2	60	75.3	92.2
Decision maker (Q14 a and b)	Q14a	Who decides oral antibiotic to purchase?
		Include Veterinarian	42.1	11.3	8	22.5	64.6	58.9	6.6	33	45.6	71.1	40.6	5.9	28	29.6	52.6
		Dairy personnel only	57.9	11.3	11	35.4	77.5	41.1	6.6	23	28.9	54.4	59.4	5.9	41	47.4	70.4
	Q14b	Who decides injectable antibiotic to purchase?
		Include Veterinarian	41.2	11.9	7	20.9	64.9	54.7	6.8	29	41.2	67.6	46.9	6.2	30	34.9	59.2
		Dairy personnel only	58.8	11.9	10	35	79.1	45.3	6.8	24	32.4	58.8	53.1	6.2	34	40.8	65
Treatment or health protocols	Q16	Have written/computerized health protocol
		Yes	66.7	10.3	14	44.5	83.3	70.2	6.1	40	57.1	80.7	81.4	4.6	57	70.5	88.9
		No	33.3	10.3	7	16.7	55.5	29.8	6.1	17	19.3	42.9	18.6	4.6	13	11.1	29.5
Record keeping for antibiotic treatment	Q24	How do you track antibiotic treatments given to cows?
		Computer + Others	29.4	11.1	5	12.7	54.4	53.4	6.5	31	40.6	65.9	82.9	4.5	58	72.1	90.1
		No computer	70.6	11.1	12	45.6	87.3	46.6	6.5	27	34.1	59.4	17.1	4.5	12	9.9	27.9
Dairy QA	Q33	Participate in animal welfare audit programs for dairy farms
		Yes	88.2	7.8	15	62.8	97.1	100	0	49			98.2	1.8	55	88.2	99.8
		No	11.8	7.8	2	2.9	37.2	0		0			1.8	1.8	1	0.2	11.8
SB 27	Q36	Aware MIAD require prescription, no more sold OTC since 2018
		Yes	95	4.9	19	71.4	99.3	100	0	56			98.5	1.5	66	90	99.8
		No	5	4.9	1	0.7	28.6	0		0			1.5	1.5	1	0.2	9.9
SB 27 affects	Q41a	Antibiotic drug cost since 1.1.2018 compared to 2017 and earlier
		Increased 1	21.1	9.4	4	8.1	44.8	16.1	4.9	9	8.5	28.2	32.4	5.7	22	22.3	44.4
		Deceased 2	15.8	8.4	3	5.1	39.4	33.9	6.3	19	22.7	47.3	27.9	5.4	19	18.5	39.8
		No change 0	63.2	11.1	12	40.1	81.4	50	6.7	28	37.1	62.9	39.7	5.9	27	28.7	51.8
	Q41a	Farm animal health since 1.1.2018 compared to 2017 and earlier
		Better 1	21.1	9.4	4	8.1	44.8	38.2	6.6	21	26.3	51.7	29	5.8	18	19	41.6
		Worse 0	10.5	7	2	2.6	34	5.5	3.1	3	1.8	15.7	8.1	3.5	5	3.4	18.1
		No change 2	68.4	10.7	13	44.9	85.2	56.4	6.7	31	43	68.9	62.9	6.1	39	50.2	74
			Mean	Std. Error	N	95% CI L	95% CI H	Mean	Std. Error	N	95% CI L	95% CI H	Mean	Std. Error	N	95% CI L	95% CI H
Average number of cows treated per month		Mastits	7.6	3.9	7	0	15.5	42.2	9.2	43	23.9	60.4	63.5	12.4	38	38.8	88.1
		Metritis	3	1.1	5	0.8	5.2	16.2	3.1	36	9.9	22.4	38	5.4	32	27.2	48.8
		Lameness	6.7	4.4	3	0	15.4	11.4	1.9	39	7.4	15.3	37	10.8	37	15.5	58.5
		Pneumonia	1.7	0.9	3	0	3.4	2.8	0.5	31	1.7	3.9	4.3	0.7	32	2.8	5.7
		Post-surgery	0.3	0.2	6	0	0.8	0.6	0.2	27	0.2	0.9	0.4	0.1	32	0.2	0.6
			Mean	Std. Error	N	95% CI L	95% CI H	Mean	Std. Error	N	95% CI L	95% CI H	Mean	Std. Error	N	95% CI L	95% CI H
Monthly incidence per 100 cows		Mastits	0.91	0.33	7	0.09	1.71	2.85	0.65	43	1.53	4.17	3.51	0.41	38	2.66	4.37
		Metritis	0.54	0.3	5	0	1.38	1.27	0.32	36	0.61	1.94	2.8	0.46	1.85	3.75	48.8
		Lameness	1.82	1.67	3	0	9.03	0.96	0.15	39	0.65	1.28	2.03	0.54	37	0.92	3.14
		Pneumonia	0.29	0.2	3	0	1.17	0.23	0.04	31	0.13	0.32	0.5	0.14	32	0.2	0.8
		Post-surgery	0.14	0.09	6	0	0.37	0.04	0.01	27	0.01	0.08	0.02	0.01	32	0.01	0.03
			Who decides oral antibiotic to purchase?
			Included a Veterinarian					No Veterinarian
		Role	Percent	SE	N	95% Confidence limits		Percent	SE	N	95% Confidence limits
						Lower	Upper				Lower	Upper
End of lactation practices	Q8a	Herd size
		< 1,305	52.2	6.1	36	40.3	63.8	57.3	5.7	43	45.8	68.1
		1,305 - 3,500	42	5.9	29	30.8	54.1	36	5.6	27	25.8	47.6
		> 3,500	5.8	2.8	4	2.2	14.6	6.7	2.9	5	2.8	15.2
	Q8b	Dairy region
		Northern California 1	11.6	3.9	8	5.8	21.7	14.6	4.1	11	8.2	24.8
		Northern San Joaquin Valley 2	47.8	6.1	33	36.2	59.7	30.7	5.4	23	21.2	42.1
		Greater southern California 0	40.6	5.9	28	29.5	52.7	54.7	5.8	41	43.2	65.7
Decision maker (Q14 a and b)	Q16	Have written or computerized health protocol
		Yes	86.9	4.1	60	76.6	93.1	65.3	5.5	49	53.8	75.3
		No	13.1	4.1	9	6.9	23.4	34.7	5.5	26	24.7	46.2
	Q17	Do you keep a drug inventory log for your dairy?
		Yes	49.3	6.2	33	37.4	61.2	50.7	5.9	37	39.2	62.1
		No	50.7	6.2	34	38.8	62.6	49.3	5.9	36	37.9	60.8
Treatment or health protocols	Q23	Record keeping for antibiotic treatment
		Any of the listed option	97.1	2.1	66	88.8	99.3	100	0	72
		None	2.9	2.1	2	0.7	11.2	0		0
Dairy QA	Q33	Participate in animal welfare audit programs for dairy farms
		Yes	98.4	1.6	60	88.9	99.8	96.7	2.3	58	87.3	99.2
		No	1.6	1.6	1	0.2	11.1	3.3	2.3	2	0.8	12.6
SB 27	Q36	Aware MIAD require prescription, no more sold OTC since 2018
		Yes	100	0	68	.	.	98.6	1.4	69	90.3	99.8
		No	0	.	0	.	.	1.4	1.4	1	0.2	9.7
SB 27 affects	Q41a	Antibiotic drug cost since 1.1.2018 compared to 2017 and earlier
		Increased 1	27.5	5.4	19	18.2	39.4	22.5	4.9	16	14.2	33.9
		Deceased 2	36.2	5.8	25	25.7	48.3	22.5	4.9	16	14.2	33.9
		No change 0	36.2	5.8	25	25.7	48.3	54.9	5.9	39	43.1	66.2
	Q41a	Farm animal health since 1.1.2018 compared to 2017 and earlier
		Better 1	35.9	6.1	23	25.1	48.5	29.4	5.6	20	19.7	41.5
		Worse 0	10.9	3.9	7	5.2	21.4	2.9	2.1	2	0.7	11.2
		No change 2	53.1	6.3	34	40.8	65.1	67.6	5.7	46	55.5	77.8
Distribution of mailed surveys by region		1282 mailed in 2018	# Mailed 2018	# Returned 2018	# Mailed 2019	# Returned 2019
		Northern California	205	21	205	24
		Northern San Joaquin Valley	513	58	510	54
		Greater Southern California	564	70	566	53
				0.116225		0.102264
Sources of info on antibiotics used to treat cows			N	%
		Veterinarian (Vet)	26	18.4397
		Drug Experience (DrugExpr); Vet	18	12.766
		DrugExpr; DrugLabel; Vet	14	9.92908
		DrugExpr; DrugLabel; CompRep; Vet	14	9.92908
		DrugExpr; CompRep; Vet	13	9.21986
		DrugLabel; Vet	8	5.67376
		Vet; CompRep	8	5.67376
		DrugExpr	6	4.25532
		DrugExpr; DrugLabel; Vet; Producer	4	2.83688
		DrugExpr; DrugLabel; CompRep; Vet; Producer	3	2.12766
		DrugExpr; DrugLabel; CompRep; Vet; Producer; Magazine	3	2.12766
		DrugExpr; CompRep; Vet; Producer	3	2.12766
		DrugLabel; Vet; CompRep	3	2.12766
		DrugLabel; Vet; Web	3	2.12766
		Product drug label (DrugLabel)	2	1.41844
		DrugExpr; DrugLabel; Vet; LocalNatMeeting	2	1.41844
		DrugExpr; CompRep; Vet; CoopExt	2	1.41844
		Combinations of [DrugExpr; CompRep; Vet; LocalNatMeeting], [DrugExpr; CompRep; Vet; Producer; LocalNatMeeting], [DrugExpr; DrugLabel; CompRep], [DrugExpr; DrugLabel; CompRep; Vet; Web], [DrugExpr; DrugLabel; Vet; FARAD; LocalNatMeeting], [DrugExpr; DrugLabel; Vet; Producer: Magazine], [DrugLabel; Vet; CompRep; FARAD; Magazine; LocalNatMeet; CoopExt], [Vet; CompRep; Magazine; CoopExt], [Vet; CompR…	1 (total 9 combinations)	0.7% (total 5.7%)
Specify how antibiotic treatments given to cows are tracked			N	%
		Computer software (Computer)	14	9.65517
		Paper records kept in barn or office (Paper)	16	11.0345
		Marking on the animal (Marking)	2	1.37931
		Memory	2	1.37931
		White/chalk board or temporary marking (Temporary)	1	0.689655
		Computer; Paper	32	22.069
		Computer; Paper; Marking	27	18.6207
		Paper; Marking	17	11.7241
		Computer; Marking	10	6.89655
		Paper; Temporary	7	4.82759
		Computer; Paper; Marking; Temporary	6	4.13793
		Paper; Marking; Temporary	5	3.44828
		Computer; Paper; Temporary	3	2.06897
		Computer; Marking; Temporary	2	1.37931
		Marking; Temporary	1	0.689655
			Mean	Std. Error	N	95% CI L	95% CI H	Mean	Std. Error	N	95% CI L	95% CI H
Average number of cows treated per month		Mastits	52.2	10.8	44	30.8	73.6	45.6	10.1	41	25.5	65.7
		Metritis	23.8	3.2	36	17.5	30.1	23.8	5.4	35	12.9	34.6
		Lameness	11.5	2	36	7.5	15.6	34.3	9.8	41	14.7	53.8
		Pneumonia	4.2	0.7	33	2.9	5.6	2.7	0.5	31	1.7	3.8
		Post-surgery	0.5	0.1	34	0.2	0.7	0.4	0.1	30	0.2	0.7
